# Supplementary material for: Aqueous synthesis of PEGylated copper sulfide nanoparticles for photoacoustic imaging of tumors
Source: Royal Society of Chemistry journal article supplement (doi:10.1039/c5nr02180d), 2015-01-01
Supplement: c5nr02180d1.pdf [file c5nr02180d1.pdf]

Electronic Supplementary Information

## Aqueous Synthesis of PEGylated Copper Sulfide Nanoparticles for Photoacoustic Imaging of Tumors

Ke Ding,<sup>a</sup> Jianfeng Zeng,<sup>b</sup> Lihong Jing,<sup>a</sup> Ruirui Qiao,<sup>\*a</sup> Chunyan Liu,<sup>a</sup> Mingxia Jiao,<sup>a</sup>  
Zhen Li,<sup>b</sup> and Mingyuan Gao<sup>\*</sup>

*a* Institute of Chemistry, Chinese Academy of Sciences, Bei Yi Jie 2, Zhong Guan Cun, Beijing 100190,  
China.

*b* School of Radiation Medicine and Protection, Medical College of Soochow University, 199 Ren-Ai  
Road, Suzhou Industrial Park, Suzhou 215123, China.

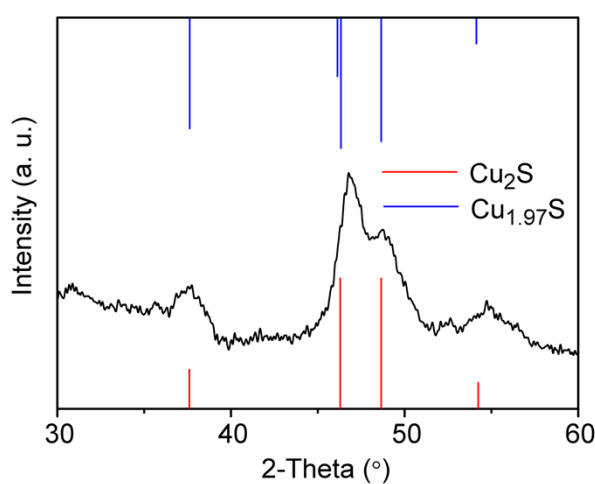

**Figure S1.** XRD patterns of PEGylated copper sulfide nanoparticles (NPs). The vertical solid line shown below the pattern is standard bulk XRD data for chalcocite ( $\text{Cu}_2\text{S}$ ) (JCPDS No. 31-0482), above the pattern is djurleite ( $\text{Cu}_{1.97}\text{S}$ ) (JCPDS No. 20-0365).

**Table S1.** The experimental and theoretically predicted hydrodynamic sizes of the differently sized PEGylated copper sulfide NPs.

| Sample | Experimental hydrodynamic size <sup>a</sup><br>(nm) | Theoretical hydrodynamic size <sup>b</sup><br>(nm) |
|--------|-----------------------------------------------------|----------------------------------------------------|
| CS-2.7 | 7.1 ± 0.1                                           | 8.1                                                |
| CS-4.8 | 10.7 ± 0.3                                          | 10.1                                               |
| CS-7.2 | 14.9 ± 0.4                                          | 12.6                                               |

<sup>a</sup> Average results of three measurements.

<sup>b</sup> The theoretical hydrodynamic sizes were obtained by assuming a simple addition of the core size and two times of the calculated hydrodynamic size of the PEG derivatives ( $d_{\text{PEG}} = 0.03824M_n^{0.559}$ ).<sup>1</sup>

### Synthesis of the TGA-capped copper sulfide NPs.

In brief, 0.092 g (1 mmol) of thioglycolic acid (TGA) was dissolved in 50 mL of water, and then 0.05 g (0.5 mmol) of CuCl was then introduced while stirring. Nitrogen gas was introduced to purge the reaction solution for 1 h. The pH value of the reaction mixture was adjusted to 9.00 by dropwise addition of 0.5 M NaOH aqueous solution. After that, 0.0187 g (0.25 mmol) of TAA was then introduced while stirring. The resultant mixture was then heated to 90°C, and the reaction was allowed for 2 h under nitrogen protection. Then the solution was cooled to room temperature. And the hydrodynamic size of TGA-capped copper sulfide NPs dispersed in water was characterized by dynamic light scattering.

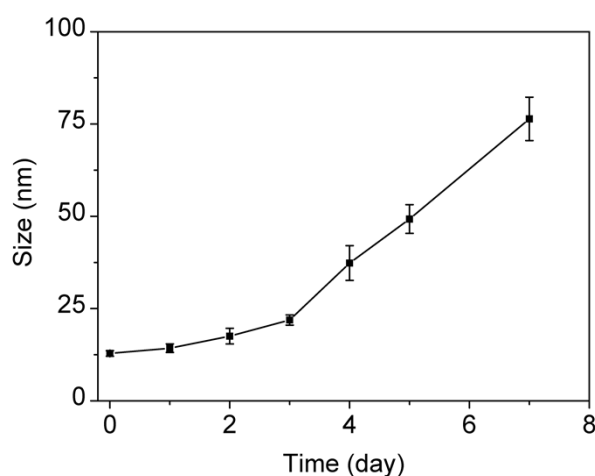

**Figure S2.** Temporal evolution of the hydrodynamic size of the as-prepared TGA-capped copper sulfide NPs in water.

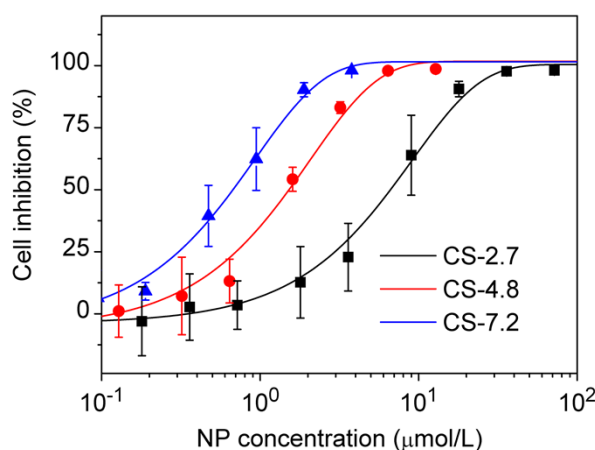

**Figure S3.** The concentration-dependent growth-inhibition of HeLa cells by copper sulfide NPs of 2.7 nm (black), 4.8 nm (red), and 7.2 nm (blue), respectively.

## References

- 1 R. A. Sperling, T. Liedl, S. Duhr, S. Kudera, M. Zanella, C. A. J. Lin, W. H. Chang, D. Braun, W. J. Parak, *J. Phys. Chem. C*, 2007,**111**, 11552-11559.
